# Supplementary material for: High training volume is associated with increased prevalence of non-allergic asthma in competitive cross-country skiers
Source: HighWire-hosted journal article supplement (doi:10.1136/bmjsem-2022-001315), 2022-05-01
Supplement: bmjsem-2022-001315supp001_data_supplement.pdf [file bmjsem-2022-001315supp001_data_supplement.pdf]

## Supplemental file 1

Mäki-Heikkilä et al. High training volume is associated with increased prevalence of nonallergic asthma in competitive cross-country skiers

### Sensitivity analysis

#### Definition of allergic asthma

Asthma was defined as allergic if the subject reported a doctor-diagnosed allergy and asthma-related symptoms when exposed to furry animals or pollens. Otherwise, asthma was defined as nonallergic. As a sensitivity analysis, two additional different definitions of allergic asthma (doctor-diagnosed asthma and doctor-diagnosed allergy to pollens or animals or doctor-diagnosed asthma and asthmatic symptoms when exposed to furry animals or pollens) were used and are presented below.

#### Doctor-diagnosed asthma and doctor-diagnosed allergy to pollens or animals

**Table 4A. Risk factors for allergic and non-allergic asthma in cross-country skiers, represented as odds ratios (OR) with 95 % confidence intervals**

|                                  | Non-allergic asthma<br>n = 43 |           |              | Allergic asthma<br>n = 48 |           |              |
|----------------------------------|-------------------------------|-----------|--------------|---------------------------|-----------|--------------|
|                                  | OR                            | 95% CI    | p            | OR                        | 95% CI    | p            |
| Age                              | 1.04                          | 1.00–1.09 | 0.078        | 1.07                      | 1.03–1.12 | <0.001       |
| 100 hours more training per year | 1.28                          | 1.08–1.51 | <b>0.004</b> | 1.25                      | 1.07–1.45 | <b>0.005</b> |
| Parents or siblings with asthma  | 2.18                          | 1.14–4.15 | <b>0.018</b> | 2.22                      | 1.23–3.99 | <b>0.008</b> |
| Female sex                       | 0.64                          | 0.32–1.25 | 0.189        | 1.04                      | 0.58–1.86 | 0.908        |
| Allergic rhinitis                | 0.42                          | 0.21–0.84 | <b>0.014</b> | ***                       |           |              |
| 50 FIS-points less               | 1.02                          | 0.86–1.22 | 0.801        | 1.18                      | 0.98–1.42 | 0.087        |

\*\*\* All skiers with allergic asthma by this definition had allergic rhinitis.

**Table 5A. Multivariable analysis for the risk on current asthma in cross-country skiers, represented as odds ratios (OR) with 95 % confidence intervals.**

|                                  | Current asthma<br>n = 91 |           |              | Non-allergic asthma<br>n = 43 |           |              | Allergic asthma<br>n = 48 |           |              |
|----------------------------------|--------------------------|-----------|--------------|-------------------------------|-----------|--------------|---------------------------|-----------|--------------|
|                                  | OR                       | 95% CI    | p            | OR                            | 95% CI    | p            | OR                        | 95% CI    | p            |
| Age                              | 1.06                     | 1.01–1.11 | <b>0.011</b> | 1.03                          | 0.97–1.09 | 0.359        | 1.10                      | 1.03–1.17 | 0.003        |
| 100 hours more training per year | 1.29                     | 1.11–1.50 | <b>0.001</b> | 1.26                          | 1.05–1.53 | <b>0.016</b> | 1.22                      | 0.99–1.50 | 0.062        |
| Parents or siblings with asthma  | 2.41                     | 1.42–4.08 | <b>0.001</b> | 2.59                          | 1.30–5.16 | 0.007        | 2.46                      | 1.19–5.05 | <b>0.015</b> |
| Allergic rhinitis                | 2.14                     | 1.27–3.60 | <b>0.004</b> | 0.37                          | 0.18–0.76 | 0.007        | ***                       |           |              |

\*\*\* All skiers with allergic asthma by this definition had allergic rhinitis.

**Doctor-diagnosed asthma and asthmatic symptoms when exposed to furry animals or pollens****Table 4B. Risk factors for allergic and non-allergic asthma in cross-country skiers, represented as odds ratios (OR) with 95 % confidence intervals**

|                                  | Non-allergic asthma<br>n = 26 |           |              | Allergic asthma<br>n = 65 |           |                  |
|----------------------------------|-------------------------------|-----------|--------------|---------------------------|-----------|------------------|
|                                  | OR                            | 95% CI    | p            | OR                        | 95% CI    | p                |
| Age                              | 1.05                          | 1.00–1.11 | 0.062        | 1.06                      | 1.02–1.11 | <b>0.003</b>     |
| 100 hours more training per year | 1.37                          | 1.13–1.68 | <b>0.002</b> | 1.24                      | 1.07–1.44 | <b>0.003</b>     |
| Parents or siblings with asthma  | 0.68                          | 0.29–1.60 | 0.372        | 3.11                      | 1.79–5.44 | <b>&lt;0.001</b> |
| Female sex                       | 1.43                          | 0.64–3.17 | 0.385        | 0.72                      | 0.41–1.25 | 0.241            |
| Allergic rhinitis                | 0.86                          | 0.38–1.93 | 0.717        | 2.81                      | 1.60–4.94 | <b>&lt;0.001</b> |
| 50 FIS-points less               | 1.54                          | 1.11–2.12 | <b>0.009</b> | 1.05                      | 0.90–1.22 | 0.556            |

**Table 5B. Multivariable analysis for the risk on current asthma in cross-country skiers, represented as odds ratios (OR) with 95 % confidence intervals.**

|                                  | Current asthma<br>n = 91 |           |              | Non-allergic asthma<br>n = 26 |           |              | Allergic asthma<br>n = 65 |           |                  |
|----------------------------------|--------------------------|-----------|--------------|-------------------------------|-----------|--------------|---------------------------|-----------|------------------|
|                                  | OR                       | 95% CI    | p            | OR                            | 95% CI    | p            | OR                        | 95% CI    | p                |
| Age                              | 1.06                     | 1.01–1.11 | <b>0.011</b> | 1.02                          | 0.95–1.09 | 0.588        | 1.06                      | 1.01–1.11 | 0.016            |
| 100 hours more training per year | 1.29                     | 1.11–1.50 | <b>0.001</b> | 1.34                          | 1.07–1.67 | <b>0.009</b> | 1.18                      | 1.00–1.39 | 0.054            |
| Parents or siblings with asthma  | 2.41                     | 1.42–4.08 | <b>0.001</b> | 0.63                          | 0.25–1.59 | 0.329        | 3.59                      | 1.98–6.51 | <b>&lt;0.001</b> |
| Allergic rhinitis                | 2.14                     | 1.27–3.60 | <b>0.004</b> | 0.92                          | 0.31–2.72 | 0.873        | 2.71                      | 1.49–4.91 | <b>0.001</b>     |
